# Supplementary material
Source: Springer Nature journal article supplement (https://www.springermedizin.de/resource/supplementary/12943_2006_164_MOESM3_ESM.pdf/9553582)

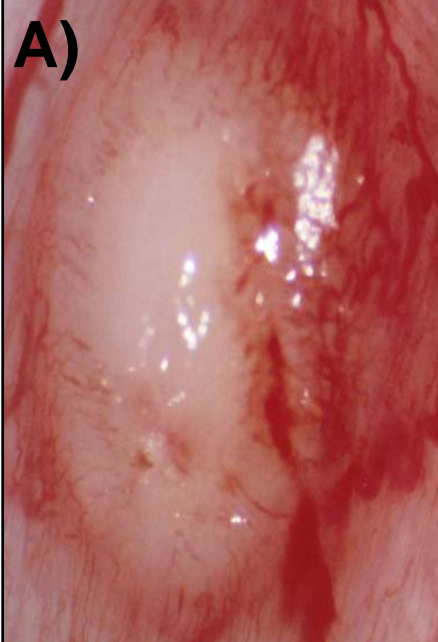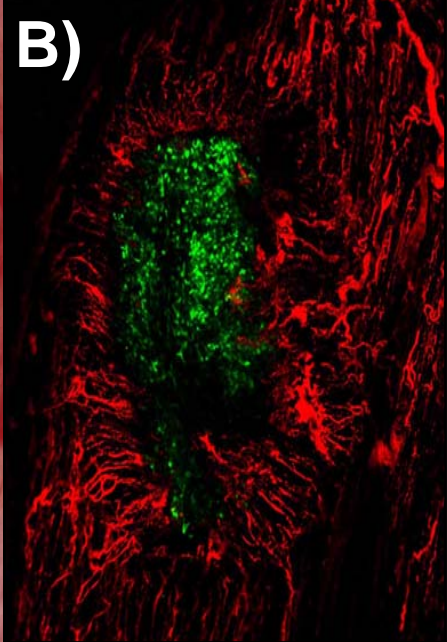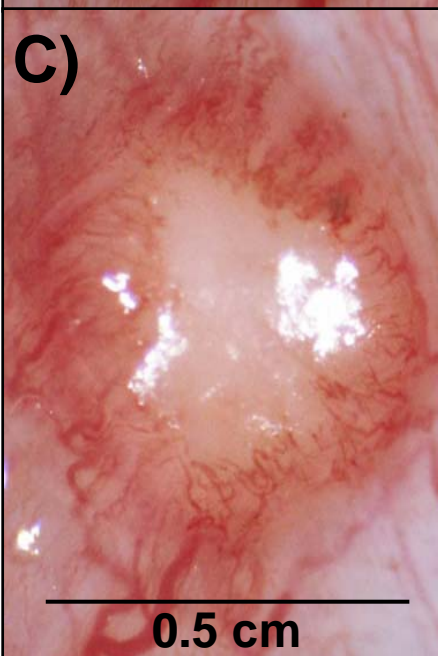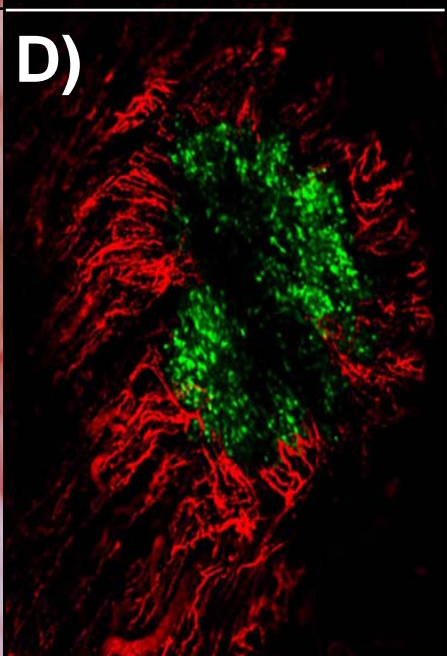

Supplement: MOESM3 [file 9553582]
